# Supplementary material
Source: publisher figshare collection journal article supplement (https://acs.figshare.com/ndownloader/files/7218065)
Supplement: Supplementary file 1 [file 7218065]

# Fabrication of GaAs, $\text{In}_x\text{Ga}_{1-x}\text{As}$ and their ZnSe core/shell colloidal quantum dots

*Joong Pill Park,<sup>a</sup> Jae-joon Lee,<sup>b</sup> and Sang-Wook Kim<sup>a,\*</sup>*

<sup>a</sup>Department of Molecular Science and Technology, Ajou University, Suwon 443-749, Korea.

<sup>b</sup>Department of Energy & Materials Engineering, Dongguk University Seoul 100-715, Korea

\* E-mail: [swkim@ajou.ac.kr](mailto:swkim@ajou.ac.kr),

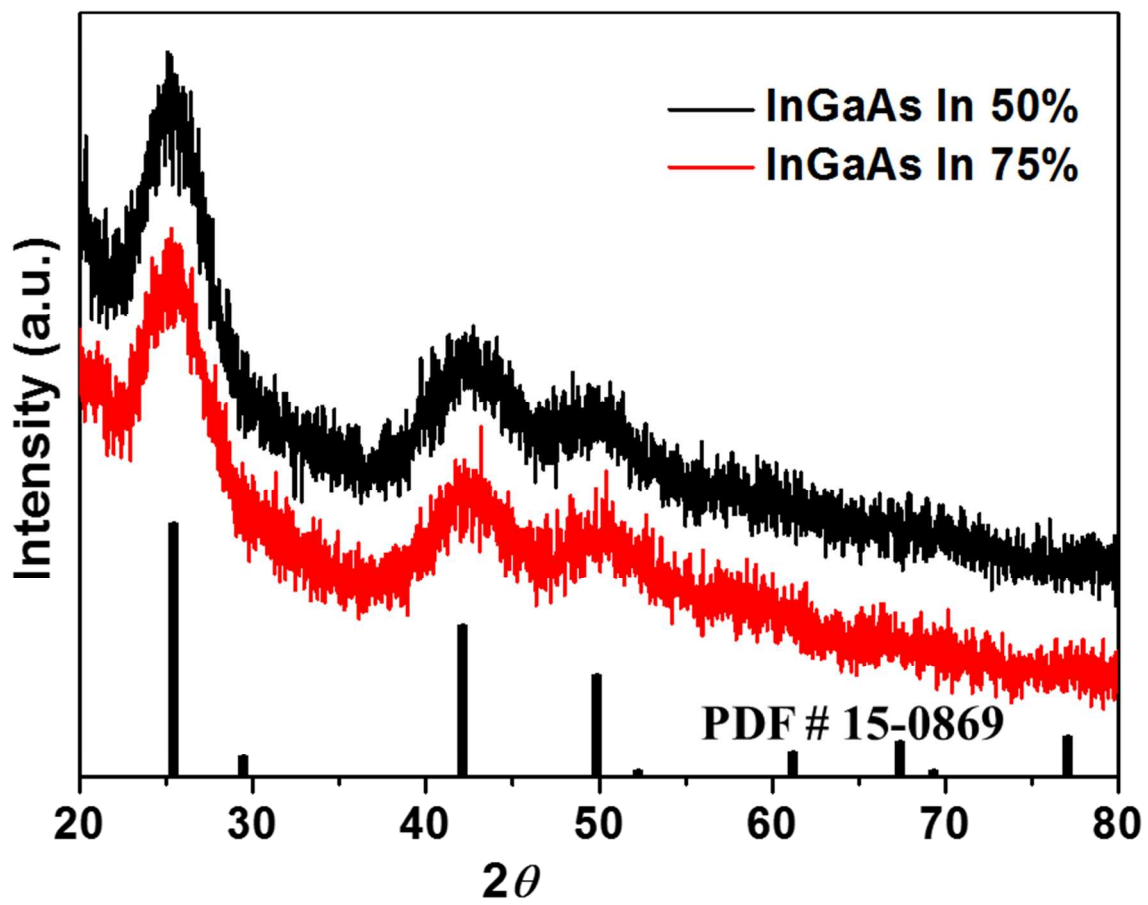

Figure. S1 XRD data of  $\text{In}_{0.5}\text{Ga}_{0.5}\text{As}$  and  $\text{In}_{0.75}\text{Ga}_{0.25}\text{As}$

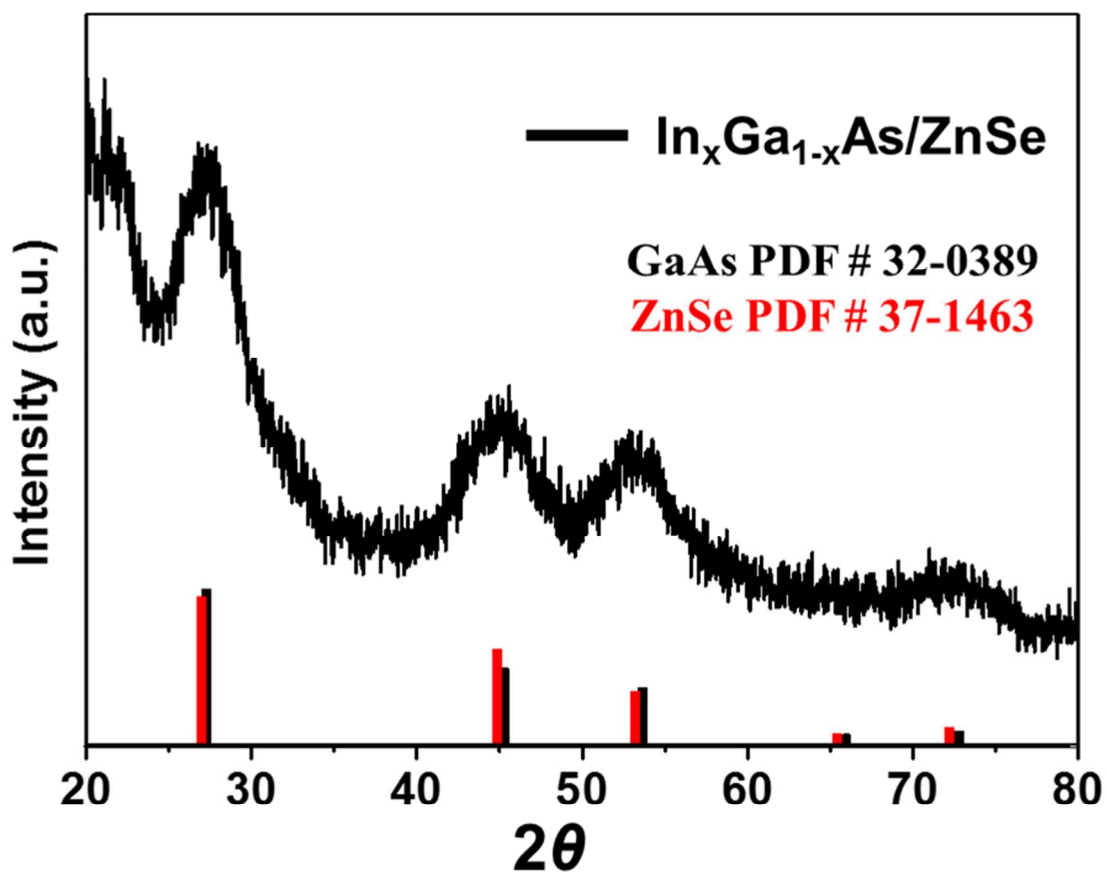

Figure. S2 XRD data  $\text{In}_x\text{Ga}_{1-x}\text{As}/\text{ZnSe}$ . The XRD data of each compositions shows similar pattern with ZnSe. The composition diversity cannot influence to the lattice parameter owing to the small particle size.

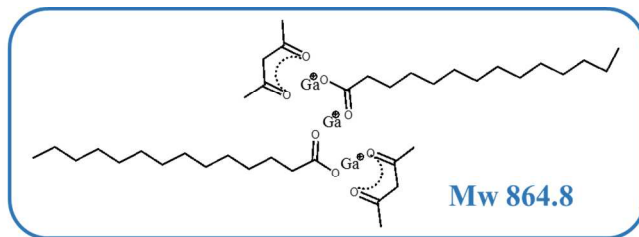

**Positive  
mode**

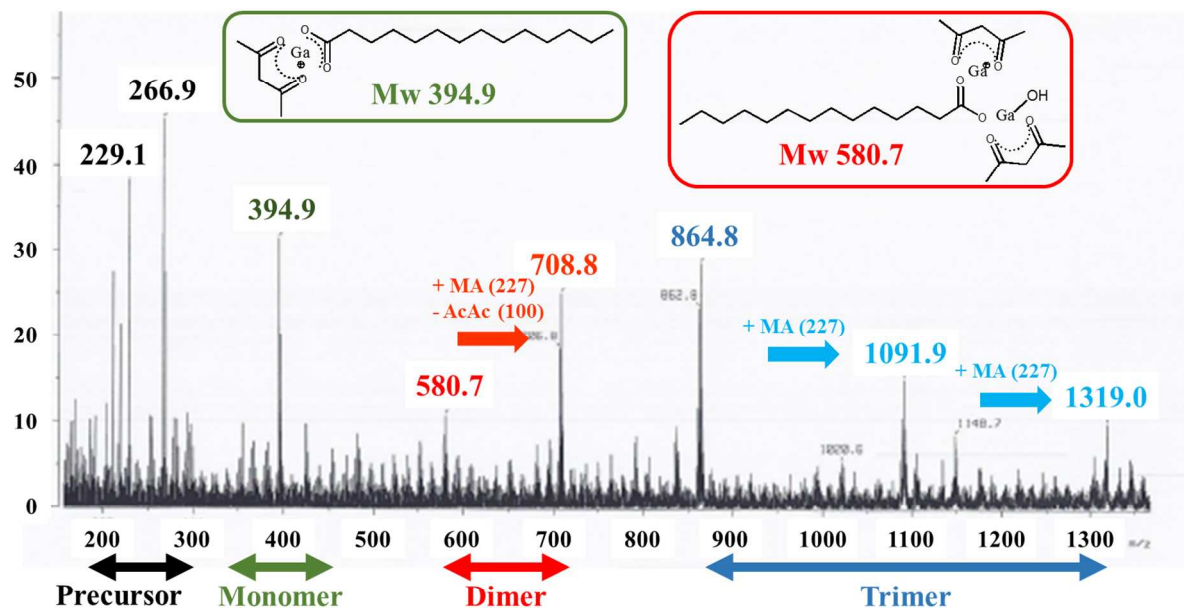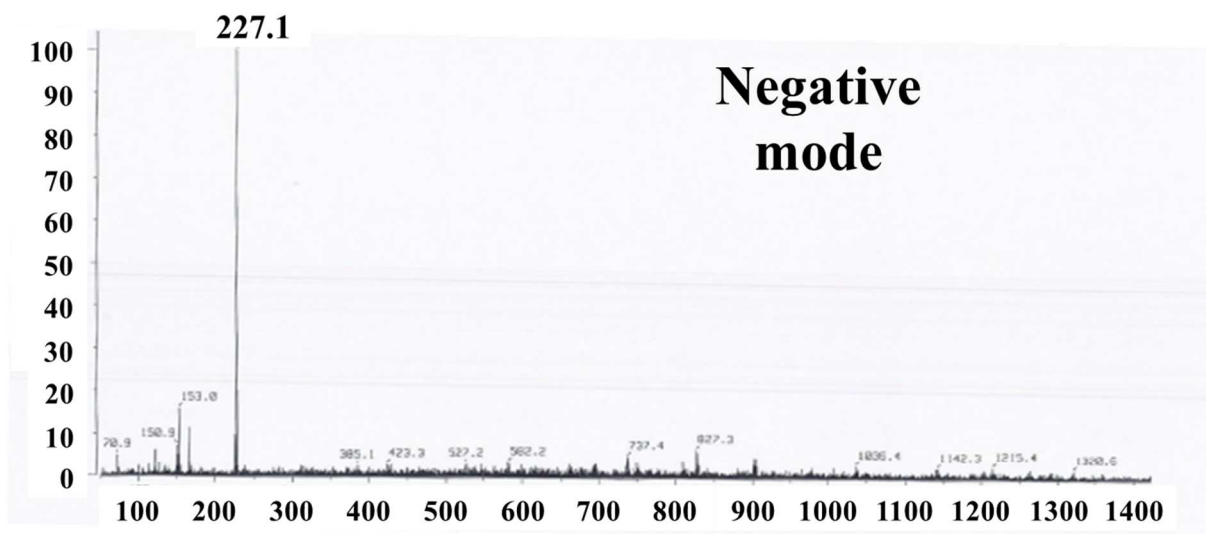

Figure. S3 FAB-mass data of Ga-MA complex. The myristic acid cannot be fully replaced, and acetylacetonate groups are attached after degassing process. Gallium hydroxide was formed on dimer type Only myristic acid was detected in negative mode.

## ICP data

### Raw data of ICP

|             | 10%          |              |              | 20%          |              |              | 30%          |              |              |
|-------------|--------------|--------------|--------------|--------------|--------------|--------------|--------------|--------------|--------------|
|             | In           | Ga           | As           | In           | Ga           | As           | In           | Ga           | As           |
| #1          | 7.401        | 33.39        | 14.18        | 11.42        | 17.75        | 9.819        | 19.70        | 21.24        | 12.23        |
| #2          | 7.371        | 34.56        | 14.05        | 11.00        | 18.35        | 9.542        | 19.25        | 21.15        | 11.91        |
| #3          | 7.411        | 34.03        | 14.17        | 11.20        | 17.36        | 9.602        | 20.61        | 20.37        | 12.71        |
| <b>Avg.</b> | <b>7.394</b> | <b>33.99</b> | <b>14.13</b> | <b>11.20</b> | <b>17.82</b> | <b>9.654</b> | <b>19.85</b> | <b>20.92</b> | <b>12.29</b> |
| Std. Dev    | 0.0205       | 0.587        | 0.076        | 0.210        | 0.502        | 0.1455       | 0.693        | 0.474        | 0.402        |

## ICP data

|     | In                |       | Ga   |       | As   |       | M:As<br>(mole) |
|-----|-------------------|-------|------|-------|------|-------|----------------|
|     | Con. <sup>1</sup> | mole  | Con. | mole  | Con. | mole  |                |
| 10% | 7.4               | 0.064 | 34.0 | 0.488 | 14.1 | 0.188 | 2.9:1          |
| 20% | 11.2              | 0.098 | 17.8 | 0.255 | 9.6  | 0.128 | 2.7:1          |
| 30% | 19.9              | 0.179 | 20.9 | 0.300 | 12.3 | 0.164 | 2.9:1          |

\*1 : ICP concentration : mg/L

### mole ratio of In:Ga.

|     | ICP data | real-reaction |            |
|-----|----------|---------------|------------|
|     |          | mole          | mole ratio |
| 10% | 1:7.6    | 0.02:0.14     | 1:7        |
| 20% | 1:2.6    | 0.04:0.12     | 1:3        |
| 30% | 1:1.7    | 0.06:0.1      | 1:1.6      |

## Synthetic method.

### **In<sub>x</sub>Ga<sub>1-x</sub>As**

In(acac)<sub>3</sub> and Ga(acac)<sub>3</sub> were mixed with various ratio with total amount of 0.2mmol. 0.2mmol of metal precursor, 0.6mmol of myristic acid and 5mL of 1-Octadecene(ODE) were put together in 25 ml 3-neck flask. Degassing process was conducted under vacuum at 110°C for 2h. After then, the flask was filled with nitrogen and the temperature was cooled down to room temperature (RT). 0.16 mmol of TMS-As and 1 ml of ODE were mixed in glovebox and the Arsenide precursor was added into the flask. The mixture was heated up to 300°C within 10min and growth for 10 min. Then, heating mantle was removed and cooled down to RT. The Final product was washed with excess acetone and precipitate using centrifuge.

### **In<sub>x</sub>Ga<sub>1-x</sub>As/ZnSe**

In(acac)<sub>3</sub> and Ga(acac)<sub>3</sub> were mixed with various ratio with total amount of 0.2mmol. 0.2mmol of metal precursor, 0.5 mmol of Zn(OAc)<sub>2</sub>, 1.4 mmol of myristic acid and 5mL of 1-Octadecene(ODE) were put together in 25 ml 3-neck flask. Degassing process was conducted under vacuum at 110°C for 2h. After then, the flask was filled with nitrogen and the temperature was cooled down to room temperature (RT). 0.16 mmol of TMS-As and 1 ml of ODE were mixed in glovebox and the Arsenide precursor was added into the flask. The mixture was heated up to 300°C within 10min. 0.5mmol of TOP-Se was slowly added at 300°C and growth for 10 min. Then, heating mantle was removed and cooled down to RT. The Final product was washed with excess acetone and precipitate using centrifuge.

\* Ga(acac)<sub>3</sub> is easily oxidized, and Ga<sub>2</sub>O<sub>3</sub> or GaOOH is formed. They emit a blue light around mid of 400 nm. (Fig. 1a)

\* Hazard waring of the TMS-As

Toxic by inhalation and if swallowed. The toxicological properties of this material have not been fully investigated. Moisture sensitive.
